# Supplementary material for: What Can We Learn from a Metagenomic Analysis of a Georgian Bacteriophage Cocktail?
Source: PubMed Central journal article supplement (PMC4690881; doi:10.3390/v7122958), 2015-12-12
Supplement: viruses-07-02958-s001.pdf [file viruses-07-02958-s001.pdf]

# Supplementary Materials: What Can We Learn from a Metagenomic Analysis of a Georgian Bacteriophage Cocktail?

Henrike Zschach, Katrine G. Joensen, Barbara Lindhard, Ole Lund, Marina Goderdzishvili, Irina Chkonia, Guliko Jgenti, Nino Kvatadze, Zemphira Alavidze, Elizabeth M. Kutter, Henrik Hasman and Mette V. Larsen

**Table S1.** Overview of the trimming parameters and assembler that gave the best result for each phage DNA sample. Trimming was based on the output of FASTQC.

| Sample                                  | Trimming                                                                        | Assembler |
|-----------------------------------------|---------------------------------------------------------------------------------|-----------|
| <i>Escherichia coli</i>                 | removed nucleotides from the right (5' end) according to quality score (min 20) | Genovo    |
|                                         | removed reads according to the mean quality (min 20)                            |           |
|                                         | removed reads shorter than 50 bp                                                |           |
|                                         | remove reads with streaks of N longer than 10                                   |           |
|                                         | removed 20 nucleotides on the left (3' end)                                     |           |
| <i>Enterococcus</i>                     | removed 10 nucleotides on the right (5' end)                                    | Genovo    |
|                                         | removed duplicate reads                                                         |           |
|                                         | removed nucleotides from the right (5' end) according to quality score (min 20) |           |
|                                         | removed reads according to the mean quality (min 20)                            |           |
|                                         | removed reads shorter than 50 bp                                                |           |
| <i>Pseudomonas aeruginosa</i> Pao1      | remove reads with streaks of N longer than 10                                   | Genovo    |
|                                         | removed 30 nucleotides on the left (3' end)                                     |           |
|                                         | removed 10 nucleotides on the right (5' end)                                    |           |
|                                         | removed duplicate reads                                                         |           |
|                                         | removed nucleotides from the right (5' end) according to quality score (min 20) |           |
| <i>Pseudomonas aeruginosa</i> 0407431-2 | Untrimmed                                                                       | Velvet    |
| <i>Proteus</i>                          | Untrimmed                                                                       | Velvet    |
| <i>Salmonella</i>                       | removed nucleotides from the right (5' end) according to quality score (min 20) | Genovo    |
|                                         | removed reads according to the mean quality (min 20)                            |           |
|                                         | removed reads shorter than 36 bp                                                |           |
|                                         | remove reads with streaks of N longer than 10                                   |           |
| <i>Shigella flexneri</i>                | removed nucleotides from the right (5' end) according to quality score (min 20) | Genovo    |
|                                         | removed reads according to the mean quality (min 20)                            |           |
|                                         | removed reads shorter than 50 bp                                                |           |
|                                         | remove reads with streaks of N longer than 10                                   |           |
|                                         | removed 20 nucleotides on the left (3' end)                                     |           |
| <i>Shigella sonnei</i>                  | removed 10 nucleotides on the right (5' end)                                    | Genovo    |
|                                         | removed duplicate reads                                                         |           |
|                                         | removed nucleotides from the right (5' end) according to quality score (min 20) |           |
|                                         | removed reads according to the mean quality (min 20)                            |           |
|                                         | removed reads shorter than 50 bp                                                |           |
| <i>Shigella sonnei</i>                  | remove reads with streaks of N longer than 10                                   | Genovo    |
|                                         | removed 20 nucleotides on the left (3' end)                                     |           |
|                                         | removed 10 nucleotides on the right (5' end)                                    |           |
|                                         | removed duplicate reads                                                         |           |
|                                         | removed nucleotides from the right (5' end) according to quality score (min 20) |           |

**Table S2.** Overview of the bacterial strains used for small scale susceptibility testing. Observe that all *Salmonella* are of the species *Salmonella enterica* subsp. *enterica* but they are identified as different serovars. All strains are part of an in-house collection.

| Genus                 | Species/Serovar          | Strain                          | Susceptibility |
|-----------------------|--------------------------|---------------------------------|----------------|
| <i>Salmonella</i>     | serovar Enteritidis      | ATCC 13076 *,+                  | Yes            |
|                       | serovar Typhimurium      | ATCC 14028 *,+                  | Yes            |
|                       | serovar Saint Paul       | DVL31 +                         | Yes            |
|                       | serovar Newport          | EQAS1 98-24475-1 +              | Yes            |
|                       | serovar Infantis         | EQAS1 98-74091-5 +              | Yes            |
|                       | serovar Derby            | EQAS2 99-65209-5 +              | Yes            |
|                       | serovar Typhimurium      | DT36 +                          | Yes            |
|                       | serovar Enteritidis      | PT1 +                           | Yes            |
|                       | serovar Heidelberg       | 75-12893-1 +                    | Yes            |
|                       | serovar Dublin           | 1111H11036 +                    | Yes            |
| <i>Staphylococcus</i> | <i>aureus</i>            | ATCC 29213 *,+                  | No             |
|                       | <i>aureus</i>            | ATCC 25923 *,+                  | Yes            |
|                       | <i>epidermidis</i>       | CCM2354                         | No             |
|                       | <i>pseudointermedius</i> | Bjorn 55-4                      | No             |
|                       | <i>hyicus</i>            | NCTC 10350                      | No             |
|                       | <i>felis</i>             | Sneleopard                      | Yes            |
|                       | <i>lugdunensis</i>       | E2-1928945                      | No             |
|                       | <i>aureus</i>            | 76670 CC8 related +             | Yes            |
|                       | <i>aureus</i>            | MSSA +                          | Yes            |
|                       | <i>aureus</i>            | MSSA A7 +                       | Yes            |
| <i>Shigella</i>       | <i>flexneri</i>          | 1s +                            | Yes            |
|                       | <i>sonnei</i>            | 2s +                            | Yes            |
|                       | <i>boydii</i>            | Not given +                     | Yes            |
|                       | <i>flexneri</i>          | Not given +                     | Yes            |
|                       | Not given                | HN-Sh, 2006-001, 2007-5-3 +     | Yes            |
| <i>Pseudomonas</i>    | <i>aeruginosa</i>        | DMS 1128/ATCC9027 *,~           | No             |
|                       | <i>aeruginosa</i>        | Skejby_2 ~                      | No             |
|                       | <i>aeruginosa</i>        | 07 52277-1 ~                    | Yes            |
|                       | <i>aeruginosa</i>        | PAOI seq ~                      | Yes            |
|                       | <i>aeruginosa</i>        | 0173267-5 ~                     | Yes            |
|                       | <i>aeruginosa</i>        | 0407431-2 ~                     | Yes            |
|                       | <i>aeruginosa</i>        | 0107338-1 ~                     | Yes            |
| <i>Escherichia</i>    | <i>coli</i>              | ATCC 25922 *                    | Yes            |
|                       | <i>coli</i>              | C 64-12 +                       | No             |
|                       | <i>coli</i>              | C 60-12 +                       | No             |
|                       | <i>coli</i>              | C 23-12 +                       | No             |
|                       | <i>coli</i>              | oedemsyge-45                    | No             |
|                       | <i>coli</i>              | BW25II3                         | Yes            |
| <i>Proteus</i>        | <i>hauseri</i>           | DSM 30118/ATCC 13315 *,~        | Yes            |
|                       | <i>vulgaris</i>          | DMS 2140/ATCC 8427 *,~          | No             |
|                       | <i>vulgaris</i>          | CCUG 36761, ATCC 13315 *,~      | Yes            |
|                       | <i>mirabilis</i>         | 76499961 ~                      | Yes            |
|                       | <i>mirabilis</i>         | E2 1928244 ~                    | No             |
| <i>Enterococcus</i>   | <i>faecalis</i>          | 2011-70-7-6 to 2011-70-250-4 ~  | No             |
|                       | <i>faecium</i>           | 2011-70-7-8 to 2011-70-252-10 ~ | Yes            |
|                       | <i>faecalis</i>          | 2008-37857 ~                    | No             |
|                       | <i>faecalis</i>          | 12 E ~                          | No             |
|                       | <i>faecalis</i>          | ATCC 29212 *,~                  | Yes            |

Notes: Reference strains are marked with an asterisk (\*). Pathogenic strains are marked with a plus (+), opportunistic pathogens with a tilde (~).

**Table S3.** Overview of phage clusters identified in the sequencing data of the host-amplified samples. Note that many clusters are much smaller in size compared to the corresponding clusters in the full cocktail. Those clusters have likely not been amplified by that particular host. Some clusters, however, e.g., EntF2 and Pao1\_new show, a great increase in size. This can be explained by the fact that those are infecting clusters (compare Table 4 in the text), which are in higher abundance in the host-amplified samples compared to their original numbers in the cocktail. Therefore, greater parts of those clusters could be recovered from the amplified samples.

| Phage Cluster<br>in Sample                           | Cluster<br>Size in bp | Corresponding<br>Cluster in Intesti | Size Ratio to<br>Corresponding Cluster |
|------------------------------------------------------|-----------------------|-------------------------------------|----------------------------------------|
| <i>Amplified on Escherichia coli</i>                 |                       |                                     |                                        |
| Eco1                                                 | 9737                  | D1                                  | 0.07                                   |
| Eco2                                                 | 3163                  | D2                                  | 0.04                                   |
| Eco3                                                 | 19,979                | D3                                  | 0.23                                   |
| Eco4                                                 | 1043                  | D4                                  | 0.02                                   |
| Eco5                                                 | 7023                  | D5                                  | 0.05                                   |
| Eco6                                                 | 133,873               | D6                                  | 1.64                                   |
| Eco7                                                 | 17,744                | D7                                  | 0.30                                   |
| Eco9                                                 | 5487                  | D9                                  | 0.14                                   |
| Eco10                                                | 39,747                | D10                                 | 0.27                                   |
| Eco11                                                | 4131                  | D11                                 | 0.07                                   |
| Eco12                                                | 12,195                | D12                                 | 0.20                                   |
| Eco13                                                | 9105                  | D13                                 | 0.05                                   |
| Eco14                                                | 185,358               | D14                                 | 1.39                                   |
| Eco15                                                | 7278                  | D15                                 | 0.17                                   |
| Eco16                                                | 18,144                | D16                                 | 0.39                                   |
| Eco17                                                | 78,630                | D17                                 | 1.91                                   |
| Eco18                                                | 8603                  | D18                                 | 0.21                                   |
| EcoP                                                 | 41,317                | Proteus phage                       | 0.40                                   |
| <i>Amplified on Enterococcus faecalis</i>            |                       |                                     |                                        |
| Ent7                                                 | 58,552                | D7                                  | 1.01                                   |
| Ent11                                                | 6268                  | D11                                 | 0.10                                   |
| Ent13                                                | 5282                  | D13                                 | 0.03                                   |
| Ent18                                                | 41,874                | D18                                 | 1.02                                   |
| EntF2                                                | 88,702                | F2                                  | 7.73                                   |
| <i>Amplified on Pseudomonas aeruginosa PAO1_seq</i>  |                       |                                     |                                        |
| Pao1_6                                               | 9257                  | D6                                  | 0.11                                   |
| Pao1_10                                              | 1477                  | D10                                 | 0.01                                   |
| Pao1_12                                              | 538                   | D12                                 | 0.01                                   |
| Pao1_F1                                              | 22,920                | F1                                  | 1.65                                   |
| Pao1_P                                               | 3075                  | Proteus phage                       | 0.03                                   |
| Pao1_new                                             | 45,478                | -                                   | 19.01                                  |
| <i>Amplified on Pseudomonas aeruginosa 0407431-2</i> |                       |                                     |                                        |
| PA0407_3                                             | 87,742                | D3                                  | 1.00                                   |
| <i>Amplified on Salmonella typhimurium</i>           |                       |                                     |                                        |
| Sal3                                                 | 515                   | D3                                  | 0.01                                   |
| Sal6                                                 | 19,359                | D6                                  | 0.24                                   |
| Sal7                                                 | 574                   | D7                                  | 0.01                                   |
| Sal13                                                | 1047                  | D13                                 | 0.01                                   |
| Sal14                                                | 717                   | D14                                 | 0.01                                   |
| Sal18                                                | 46,366                | D18                                 | 1.13                                   |
| SalF2                                                | 94,543                | F2                                  | 8.24                                   |
| SalP                                                 | 670                   | Proteus phage                       | 0.01                                   |

Table S3.Cont.

| Phage Cluster<br>in Sample            | Cluster<br>Size in bp | Corresponding<br>Cluster in Intesti | Size Ratio to<br>Corresponding Cluster |
|---------------------------------------|-----------------------|-------------------------------------|----------------------------------------|
| <i>Amplified on Shigella flexneri</i> |                       |                                     |                                        |
| ShiF11                                | 2402                  | D1                                  | 0.02                                   |
| ShiF12                                | 4799                  | D2                                  | 0.06                                   |
| ShiF13                                | 1357                  | D3                                  | 0.02                                   |
| ShiF16                                | 21,797                | D6                                  | 0.27                                   |
| ShiF17                                | 3946                  | D7                                  | 0.07                                   |
| ShiF19                                | 3362                  | D9                                  | 0.08                                   |
| ShiF110                               | 1102                  | D10                                 | 0.01                                   |
| ShiF112                               | 7707                  | D12                                 | 0.13                                   |
| ShiF113                               | 1784                  | D13                                 | 0.01                                   |
| ShiF114                               | 177,744               | D14                                 | 1.34                                   |
| ShiF115                               | 48,286                | D15                                 | 1.10                                   |
| ShiF116                               | 4765                  | D16                                 | 0.10                                   |
| <i>Amplified on Shigella sonnei</i>   |                       |                                     |                                        |
| ShiS2                                 | 6868                  | D2                                  | 0.09                                   |
| ShiS6                                 | 11,588                | D6                                  | 0.14                                   |
| ShiS14                                | 173,647               | D14                                 | 1.31                                   |
| ShiS15                                | 49,031                | D15                                 | 1.12                                   |
| ShiS16                                | 4075                  | D16                                 | 0.09                                   |
| ShiSP                                 | 5715                  | Proteus phage                       | 0.05                                   |
| <i>Amplified on Proteus vulgaris</i>  |                       |                                     |                                        |
| Prot17                                | 59,325                | D17                                 | 1.44                                   |
| ProtP                                 | 102,963               | Proteus phage                       | 0.99                                   |

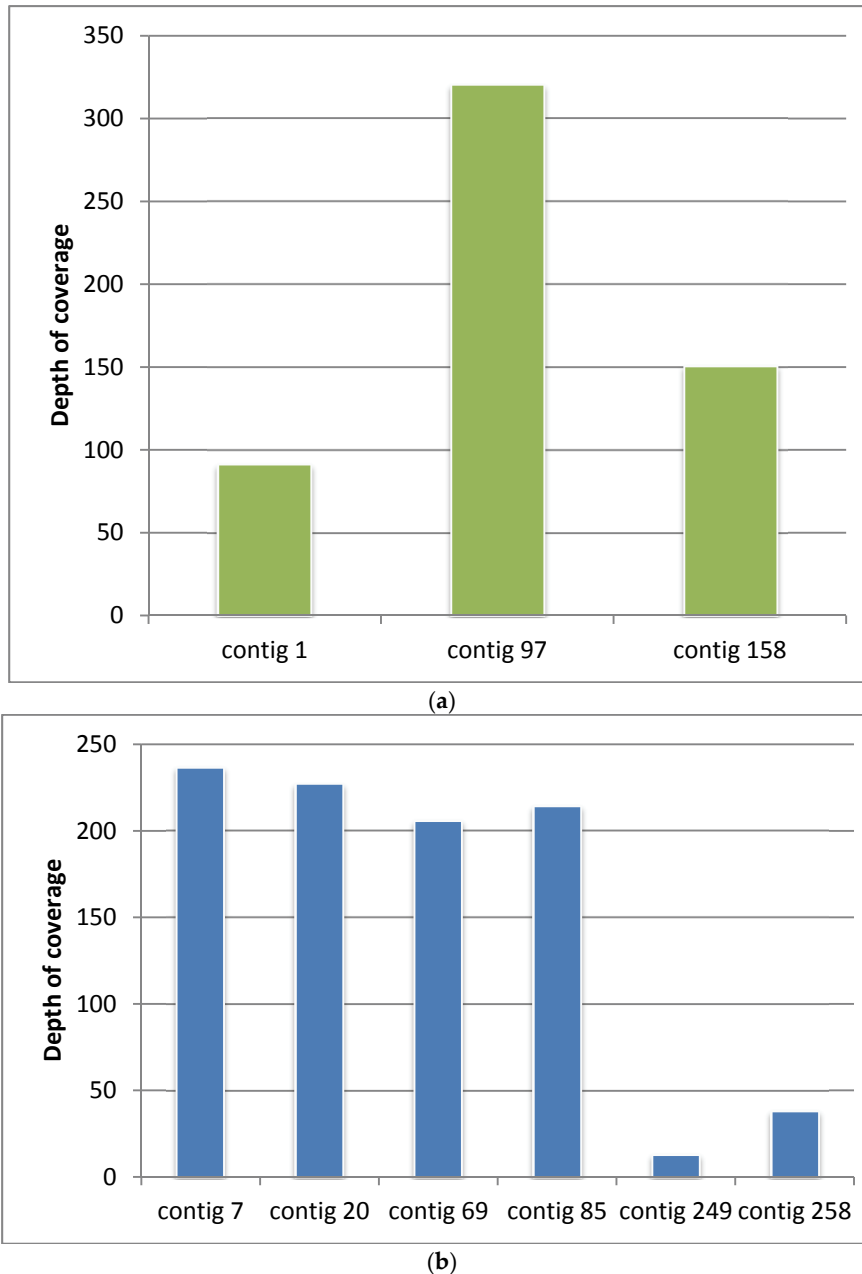

**Figure S1.** Two examples of clusters whose depth of coverage had a large standard deviation. The lower the contig ID, the longer the contig. (a) Depth of coverage of cluster D1. Contig 1, which is the longest, has a much lower depth of coverage than the short contigs, 97 and 158. Annotation results showed that many of the genes in contigs 97 and 158 show homology to genes annotated as “terminal repeat-encoded protein (Tre)”; (b) Depth of coverage of cluster D6. The two short contigs, 249 and 258, have much lower depth than the other contigs in that group. We theorize that they could represent divergent regions only present in a few of the phages in that cluster

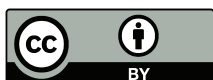

© 2015 by the authors; licensee MDPI, Basel, Switzerland. This article is an open access article distributed under the terms and conditions of the Creative Commons by Attribution (CC-BY) license (<http://creativecommons.org/licenses/by/4.0/>).
